# Supplementary material for: Phagocyte activity reflects mammalian homeo- and hetero-thermic physiological states
Source: PubMed Central journal article supplement (PMC7339577; doi:10.1186/s12917-020-02450-z), 2020-07-06
Supplement: 12917_2020_2450_MOESM1_ESM.pdf [file 12917_2020_2450_MOESM1_ESM.pdf]

**Title**

Phagocyte activity reflects mammalian homeo- and hetero-thermic physiological states

**Authors**

Jiri Pikula, Tomas Heger, Hana Bandouchova, Veronika Kovacova, Monika Nemcova, Ivana Papezikova, Vladimir Piacek, Renata Zajíčková, Jan Zukal

**Supplementary Table S1**

Data (log-transformed) on blood parameters and phagocyte activity in *Myotis myotis*, *Nyctalus noctula* and *Mus musculus*

| Species            | Na    | K     | Cl    | tCO2  | BUN   | Glu   | pH    | pCO2  | HCO3  | AnGAP | RBC   | WBC   |
|--------------------|-------|-------|-------|-------|-------|-------|-------|-------|-------|-------|-------|-------|
| <i>M. myotis</i>   | 2,179 | 0,875 | 2,045 | 1,415 | 1,324 | 1,021 | 0,861 | 0,859 | 1,382 | 1,380 | 1,007 | 0,643 |
| <i>M. myotis</i>   | 2,190 | 0,934 | 2,072 | 1,362 | 1,362 | 0,863 | 0,865 | 0,739 | 1,340 | 1,362 | 1,144 | 0,643 |
| <i>M. myotis</i>   | 2,179 | 0,886 | 2,064 | 1,279 | 1,375 | 0,839 | 0,864 | 0,688 | 1,262 | 1,380 | 1,085 | 0,748 |
| <i>M. myotis</i>   | 2,152 | 0,839 | 2,033 | 1,279 | 1,220 | 0,732 | 0,855 | 0,823 | 1,250 | 1,362 | 1,093 | 0,681 |
| <i>M. myotis</i>   | 2,170 | 0,863 | 2,061 | 1,301 | 1,276 | 0,944 | 0,860 | 0,751 | 1,262 | 1,342 | 1,052 | 0,204 |
| <i>M. myotis</i>   | 2,170 | 0,857 | 2,041 | 1,398 | 1,303 | 0,996 | 0,864 | 0,804 | 1,378 | 1,342 | 1,479 | 0,447 |
| <i>M. myotis</i>   | 2,167 | 0,924 | 2,037 | 1,380 | 1,530 | 0,820 | 0,858 | 0,861 | 1,344 | 1,380 | 0,980 | 0,833 |
| <i>M. myotis</i>   | 2,170 | 0,892 | 2,061 |       | 1,408 | 0,875 |       |       |       |       | 1,145 | 0,857 |
| <i>M. myotis</i>   | 2,173 | 0,914 | 2,049 | 1,398 | 1,369 | 0,826 | 0,869 | 0,710 | 1,369 | 1,342 | 1,104 | 0,447 |
| <i>M. myotis</i>   | 2,185 | 0,886 | 2,086 | 1,204 | 1,447 | 0,763 | 0,858 | 0,692 | 1,164 | 1,380 | 1,032 | 0,944 |
| <i>M. myotis</i>   | 2,179 | 0,919 | 2,076 | 1,322 | 1,320 | 0,845 | 0,863 | 0,732 | 1,292 | 1,301 | 0,966 | 0,903 |
| <i>N. noctula</i>  | 2,176 | 0,954 | 2,090 | 1,322 | 1,316 | 0,813 | 0,861 | 0,762 | 1,297 |       | 0,702 | 1,049 |
| <i>N. noctula</i>  | 2,190 | 0,892 | 2,093 | 1,342 | 1,342 | 0,556 | 0,861 | 0,788 | 1,320 | 1,255 | 0,966 | 0,833 |
| <i>N. noctula</i>  | 2,155 | 0,863 | 2,064 | 1,255 | 1,140 | 0,740 | 0,861 | 0,716 | 1,238 | 1,230 | 0,857 | 0,833 |
| <i>N. noctula</i>  | 2,188 | 0,919 | 2,090 | 1,398 | 1,207 | 0,380 | 0,861 | 0,839 | 1,365 | 1,230 | 0,835 | 0,881 |
| <i>N. noctula</i>  | 2,188 | 0,863 | 2,076 | 1,568 | 1,188 | 0,531 | 0,862 | 0,994 | 1,539 | 0,845 | 0,763 | 0,964 |
| <i>N. noctula</i>  | 2,185 | 0,851 | 2,093 | 1,322 | 1,215 | 0,568 | 0,860 | 0,772 | 1,290 | 1,230 | 0,946 | 0,881 |
| <i>N. noctula</i>  | 2,188 | 0,863 | 2,079 | 1,398 | 1,090 | 0,447 | 0,861 | 0,837 | 1,365 | 1,255 | 0,748 | 0,778 |
| <i>N. noctula</i>  | 2,182 | 0,881 | 2,093 | 1,380 | 1,193 | 0,462 | 0,857 | 0,880 | 1,342 | 1,146 | 0,903 | 0,833 |
| <i>N. noctula</i>  | 2,176 | 0,857 | 2,083 | 1,380 | 1,049 | 0,462 | 0,861 | 0,827 | 1,350 | 1,146 | 0,699 | 0,924 |
| <i>N. noctula</i>  | 2,173 | 0,845 | 2,086 | 1,342 | 1,029 | 0,785 | 0,858 | 0,842 | 1,312 | 1,146 | 0,905 | 0,964 |
| <i>N. noctula</i>  | 2,173 | 0,799 | 2,086 | 1,301 | 0,973 | 0,813 | 0,863 | 0,708 | 1,267 | 1,176 | 0,922 | 0,643 |
| <i>N. noctula</i>  | 2,170 | 0,778 | 2,076 | 1,279 | 0,987 | 0,724 | 0,857 | 0,800 | 1,255 | 1,230 | 0,845 | 1,033 |
| <i>M. musculus</i> | 2,146 | 0,613 | 2,017 | 1,415 | 0,380 | 1,097 | 0,865 | 0,782 | 1,382 | 1,204 | 0,872 | 0,716 |
| <i>M. musculus</i> | 2,152 | 0,724 | 2,045 | 1,362 | 0,748 | 0,987 | 0,862 | 0,787 | 1,326 | 1,176 | 0,846 | 0,914 |
| <i>M. musculus</i> | 2,152 | 0,756 | 2,057 | 1,322 | 0,799 | 1,029 | 0,863 | 0,744 | 1,305 | 1,114 | 0,836 | 0,716 |
| <i>M. musculus</i> | 2,155 | 0,732 | 2,049 | 1,398 | 0,462 | 0,973 | 0,862 | 0,835 | 1,373 | 1,114 | 0,848 | 0,633 |
| <i>M. musculus</i> | 2,155 | 0,756 | 2,049 | 1,380 | 0,672 | 1,053 | 0,861 | 0,820 | 1,348 | 1,146 | 0,883 | 0,716 |
| <i>M. musculus</i> | 2,161 | 0,633 | 2,053 | 1,398 | 0,531 | 0,924 | 0,862 | 0,819 | 1,364 | 1,114 | 0,836 | 0,568 |
| <i>M. musculus</i> | 2,158 | 0,643 | 2,053 | 1,447 | 0,322 | 1,000 | 0,861 | 0,891 | 1,418 | 1,000 | 0,829 | 0,519 |
| <i>M. musculus</i> | 2,164 | 0,716 | 2,068 | 1,342 | 0,785 | 1,045 | 0,855 | 0,873 | 1,310 | 1,146 | 0,836 | 0,716 |
| <i>M. musculus</i> | 2,146 | 0,806 | 2,045 | 1,322 | 0,778 | 0,964 | 0,862 | 0,754 | 1,294 | 1,176 | 0,881 | 0,785 |
| <i>M. musculus</i> | 2,155 | 0,732 | 2,053 | 1,362 | 0,708 | 1,000 | 0,860 | 0,806 | 1,326 | 1,146 | 0,782 | 0,491 |
| <i>M. musculus</i> | 2,161 | 0,748 | 2,057 | 1,342 | 0,699 | 0,964 | 0,858 | 0,825 | 1,310 | 1,204 | 0,809 | 0,633 |
| <i>M. musculus</i> | 2,152 | 0,724 | 2,041 | 1,380 | 0,643 | 1,009 | 0,858 | 0,871 | 1,348 | 1,176 | 0,862 | 0,230 |
| <i>M. musculus</i> | 2,164 | 0,699 | 2,053 | 1,398 | 0,580 | 0,954 | 0,860 | 0,870 | 1,375 | 1,146 | 0,881 | 0,301 |

| MCV   | MCH   | PLT   | Hct   | Hb    | Peak  | T <sub>peak</sub> | T <sub>start</sub> | Intergal | Adjusted<br>Integral | T <sub>end</sub> |
|-------|-------|-------|-------|-------|-------|-------------------|--------------------|----------|----------------------|------------------|
| 2,265 | 1,830 | 3,089 | 1,667 | 2,236 | 0,680 | 3,589             | 2,878              | 4,565    | 0,922                | 4,066            |
| 2,255 | 1,760 | 2,817 | 1,795 | 2,301 | 0,841 | 3,706             | 3,157              | 4,512    | 0,869                | 3,939            |
| 2,265 | 1,817 | 2,754 | 1,748 | 2,301 | 1,251 | 3,625             | 2,688              | 5,064    | 1,316                | 4,113            |
| 2,255 | 1,792 | 2,905 | 1,751 | 2,283 | 1,102 | 3,680             | 2,918              | 4,864    | 1,183                | 4,038            |
| 2,265 | 1,833 | 2,763 | 1,713 | 2,283 | 0,468 | 3,826             | 3,578              | 3,934    | 0,730                | 3,866            |
| 2,255 | 1,742 | 2,772 | 1,803 | 2,292 | 0,572 | 3,654             | 3,063              | 4,462    | 1,015                | 4,048            |
| 2,292 | 1,848 | 2,584 | 1,667 | 2,225 | 1,120 | 3,653             | 2,830              | 4,914    | 1,081                | 4,071            |
| 2,236 | 1,784 | 2,787 | 1,781 | 2,326 | 1,164 | 3,668             | 2,916              | 4,858    | 1,000                | 3,981            |
| 2,255 | 1,787 | 2,784 | 1,754 | 2,334 | 1,228 | 3,693             | 2,867              | 5,001    | 1,554                | 4,065            |
| 2,246 | 1,835 | 2,806 | 1,678 | 2,265 | 1,593 | 3,697             | 2,731              | 5,315    | 1,370                | 4,046            |
| 2,265 | 1,872 | 3,135 | 1,627 | 2,236 | 1,690 | 3,574             | 2,419              | 5,442    | 1,538                | 4,106            |
| 2,225 | 2,155 |       | 1,326 | 2,255 | 1,814 | 3,668             | 2,537              | 5,572    | 1,523                | 4,105            |
| 2,246 | 1,971 | 2,912 | 1,606 | 2,334 | 1,114 | 3,748             | 3,073              | 4,809    | 0,976                | 3,991            |
| 2,236 | 2,000 | 2,930 | 1,494 | 2,255 | 0,999 | 3,732             | 3,115              | 4,676    | 0,843                | 3,964            |
| 2,236 | 2,041 | 2,934 | 1,465 | 2,274 | 1,509 | 3,754             | 2,837              | 5,278    | 1,397                | 4,086            |
| 2,236 | 2,149 |       | 1,401 | 2,310 | 1,290 | 3,790             | 2,959              | 5,126    | 1,163                | 4,135            |
| 2,236 | 1,998 | 2,986 | 1,580 | 2,342 | 1,448 | 3,773             | 2,940              | 5,151    | 1,270                | 4,024            |
| 2,246 | 2,089 | 2,932 | 1,394 | 2,236 | 1,549 | 3,794             | 2,878              | 5,328    | 1,550                | 4,100            |
| 2,236 | 1,991 | 2,820 | 1,531 | 2,292 | 1,063 | 3,792             | 3,186              | 4,714    | 0,882                | 3,967            |
| 2,225 | 2,139 |       | 1,326 | 2,236 | 1,850 | 3,821             | 2,500              | 5,923    | 1,998                |                  |
| 2,236 | 1,980 | 2,840 | 1,542 | 2,283 | 1,498 | 3,793             | 2,934              | 5,223    | 1,259                | 4,047            |
| 2,236 | 1,934 | 2,647 | 1,556 | 2,255 | 1,179 | 3,760             | 3,074              | 4,846    | 1,202                | 3,976            |
| 2,236 | 2,049 | 2,787 | 1,477 | 2,292 | 1,594 | 3,752             | 2,828              | 5,308    | 1,274                | 4,039            |
| 1,699 | 1,217 | 2,877 | 1,572 | 2,090 | 1,275 | 3,162             | 1,779              | 4,996    | 1,280                | 4,108            |
| 1,732 | 1,260 | 2,900 | 1,577 | 2,107 | 2,004 | 3,080             | 1,260              | 5,633    | 1,719                | 4,204            |
| 1,748 | 1,225 | 2,973 | 1,585 | 2,061 | 1,757 | 3,125             | 1,495              | 5,400    | 1,684                | 4,144            |
| 1,699 | 1,212 | 3,005 | 1,551 | 2,061 | 1,720 | 3,133             | 1,499              | 5,389    | 1,755                | 4,170            |
| 1,716 | 1,225 |       | 1,600 | 2,107 | 1,618 | 3,163             | 1,609              | 5,304    | 1,588                | 4,156            |
| 1,708 | 1,243 | 2,972 | 1,543 | 2,079 | 1,468 | 3,098             | 1,676              | 5,061    | 1,493                | 4,014            |
| 1,785 | 1,255 | 3,008 | 1,616 | 2,083 | 1,606 | 3,355             | 1,947              | 5,383    | 1,865                | 4,202            |
| 1,732 | 1,250 | 2,895 | 1,565 | 2,086 | 1,791 | 3,053             | 1,218              | 5,489    | 1,773                | 4,272            |
| 1,716 | 1,262 | 2,979 | 1,597 | 2,143 | 1,565 | 3,198             | 1,717              | 5,258    | 1,472                | 4,137            |
| 1,724 | 1,212 | 2,789 | 1,509 | 2,097 | 1,417 | 3,209             | 1,797              | 5,137    | 1,645                | 4,132            |
| 1,724 | 1,243 | 2,943 | 1,534 | 2,053 | 1,755 | 3,195             | 1,692              | 5,379    | 1,746                | 4,083            |
| 1,724 | 1,274 | 2,954 | 1,588 | 2,137 | 1,221 | 3,188             | 1,880              | 4,936    | 1,706                | 4,077            |
| 1,748 | 1,262 | 2,813 | 1,604 | 2,134 | 1,026 | 3,184             | 2,032              | 4,715    | 1,414                | 3,984            |
